# Supplementary material for: A new compound Na5Mn4(PO4)4F4·2H2O with a rarely mixed valence spin chain showing multiple magnetic transitions
Source: Royal Society of Chemistry journal article supplement (doi:10.1039/d3qi01389h), 2023-01-01
Supplement: d3qi01389h1.pdf [file d3qi01389h1.pdf]

## Supporting Information

### **A new compound $\text{Na}_5\text{Mn}_4(\text{PO}_4)_4\text{F}_4 \cdot 2\text{H}_2\text{O}$ with a rarely mixed valence spin chain showing multiple magnetic transitions**

Qi Luo<sup>a,b</sup>, Ningxia Li<sup>a</sup>, Zhiying Zhao<sup>a</sup>, Meiyan Cui<sup>a</sup>, Zhangzhen He<sup>\*,a</sup>

<sup>a</sup>State Key Laboratory of Structural Chemistry, Fujian Institute of Research on the Structure of Matter, Chinese Academy of Sciences, Fuzhou 350002, China

<sup>b</sup>College of Chemistry and Materials Science, Fujian Normal University, Fuzhou 350007, China

\*E-mail: [hc1988@hotmail.com](mailto:hc1988@hotmail.com); [hezz@fjirsm.ac.cn](mailto:hezz@fjirsm.ac.cn).

**Fig. S1** The powder XRD patterns of  $\text{Na}_5\text{Mn}_4(\text{PO}_4)_4\text{F}_4 \cdot 2\text{H}_2\text{O}$

**Fig. S2** The energy-dispersive spectrometry (EDS) of  $\text{Na}_5\text{Mn}_4(\text{PO}_4)_4\text{F}_4 \cdot 2\text{H}_2\text{O}$

**Fig. S3** The  $\chi$ T-T curve of  $\text{Na}_5\text{Mn}_4(\text{PO}_4)_4\text{F}_4 \cdot 2\text{H}_2\text{O}$

**Fig. S4** Magnetic susceptibilities of  $\text{Na}_5\text{Mn}_4(\text{PO}_4)_4\text{F}_4 \cdot 2\text{H}_2\text{O}$  measured at different magnetic fields

**Fig. S5** Magnetization curves of  $\text{Na}_5\text{Mn}_4(\text{PO}_4)_4\text{F}_4 \cdot 2\text{H}_2\text{O}$  measured under applied field of -8T to 8T at different temperatures

**Table S1.** Crystal data and structure refinements for  $\text{Na}_5\text{Mn}_4(\text{PO}_4)_4\text{F}_4 \cdot 2\text{H}_2\text{O}$

**Table S2.** Atomic coordinates and equivalent isotropic displacement parameters for  $\text{Na}_5\text{Mn}_4(\text{PO}_4)_4\text{F}_4 \cdot 2\text{H}_2\text{O}$ .

**Table S3.** Anisotropic displacement parameters for  $\text{Na}_5\text{Mn}_4(\text{PO}_4)_4\text{F}_4 \cdot 2\text{H}_2\text{O}$ .

**Table S4.** Bond lengths for  $\text{Na}_5\text{Mn}_4(\text{PO}_4)_4\text{F}_4 \cdot 2\text{H}_2\text{O}$ .

**Table S5.** Angles for  $\text{Na}_5\text{Mn}_4(\text{PO}_4)_4\text{F}_4 \cdot 2\text{H}_2\text{O}$ .

**Table S6.** Hydrogen Atom Coordinates ( $\text{\AA} \times 10^4$ ) and Isotropic Displacement Parameters ( $\text{\AA}^2 \times 10^3$ ) for  $\text{Na}_5\text{Mn}_4(\text{PO}_4)_4\text{F}_4 \cdot 2\text{H}_2\text{O}$ .

## Experimental details:

### 1. Synthesis

$\text{Na}_5\text{Mn}_4(\text{PO}_4)_4\text{F}_4 \cdot 2\text{H}_2\text{O}$  was obtained by a hydrothermal method using the mixture of  $\text{Mn}_2\text{O}_3$  (AR, 0.1816g),  $\text{MnCl}_2$  (AR, 0.01g),  $\text{NaF}$  (AR, 0.6g), and 0.5 ml  $\text{H}_3\text{PO}_4$  (AR,  $\geq 85\%$ ) as the starting materials. The mixture was stirred completely in 1 mL of deionized water and sealed in autoclaves equipped with 28 mL Teflon liners. The autoclaves were heated to 210 °C and held for 3 days, and then slowly cooled for 3 days to room temperature. Following that, some black crystals were produced by washing with anhydrous ethanol and drying at 60 °C. Lastly, they were chosen manually under a microscope. The powder samples were generated by grinding such tiny single crystals, and the purity was determined using powder X-ray diffraction (XRD) data obtained on a Rigaku Mini-Flex 600 diffractometer (Fig. S1), and the results are in good agreement with that simulated from single crystal data. The EDS studies (Fig. S2) yielded an average molar ratio of 5.1/3.9/3.8 for Na/Mn/P, which is consistent with the stoichiometric ratio of  $\text{Na}_5\text{Mn}_4(\text{PO}_4)_4\text{F}_4 \cdot 2\text{H}_2\text{O}$ .

### 2. X-ray crystallographic studies

A small-size single crystal was selected and mounted on a glassy fiber for single-crystal X-ray diffraction measurements. Single-crystal data of the compound were collected on an XtaLAB Synergy diffractometer using  $\text{Cu-K}\alpha$  radiation ( $\lambda = 1.54184 \text{ \AA}$ ) at 293 K. The structure was solved by direct methods and refined by Olex-2 software<sup>1</sup>. The structure was solved with the SHELXT<sup>2</sup> structure solution program using Intrinsic Phasing and refined with the SHELXL<sup>3</sup> refinement package using Least Squares minimization. Crystallographic data and structure refinement parameters are summarized in Table S1. The detailed crystal parameters including the final refined atomic positions, displacement parameters, the selected bond lengths [ $\text{\AA}$ ], and selected bond angles [deg] are listed in Tables S2–S6 in the supporting information. Powder X-ray diffraction (PXRD) patterns were recorded on a Miniflex-600 diffractometer using  $\text{Cu K}\alpha$  radiation ( $\lambda = 0.154 \text{ nm}$ ) at room temperature. Temperature dependent PXRD measurements were performed in the range of  $2\theta = 5 - 65^\circ$  with a scan speed of  $1^\circ/\text{min}$ .

### 3. Magnetic measurements

Magnetic measurements were performed using a Quantum Design Physical Property Measurement System (PPMS, QD). The powder sample was placed in a gel capsule sample holder suspended in a plastic drinking straw. Magnetic susceptibilities were measured between 2 K and 300 K under different magnetic fields. Magnetization was measured at different temperatures under applied field from -8 T to 8 T. Heat capacity data were determined by a relaxation method using the same PPMS system under zero field.

### 4. Thermal analysis and FT-IR spectroscopy

Thermogravimetric analyses (TGA) were performed under a nitrogen atmosphere with a heating rate of  $10\text{ }^{\circ}\text{C}\cdot\text{min}^{-1}$  by using a NETZSCH STA449F3 thermogravimetric analyzer. The samples were placed in  $\text{Al}_2\text{O}_3$  crucibles and heated from room temperature to  $800\text{ }^{\circ}\text{C}$ . Fourier transform infrared (IR) spectroscopy was performed using KBr pellets on a Bruker VERTEX 70 spectrometer in the  $400\text{--}4000\text{ cm}^{-1}$ .

### References

- 1 V. Dolomanov, L. J. Bourhis, R. J. Gildea, J. A. K. Howard and H. Puschmann, *J. Appl. Cryst.*, 2009, **42**, 339-341.
- 2 G. M. Sheldrick, *Acta Crystallogr A Found Adv*, 2015, **71**, 3-8.
- 3 G. M. Sheldrick, *Acta Crystallogr C Struct Chem*, 2015, **71**, 3-8.

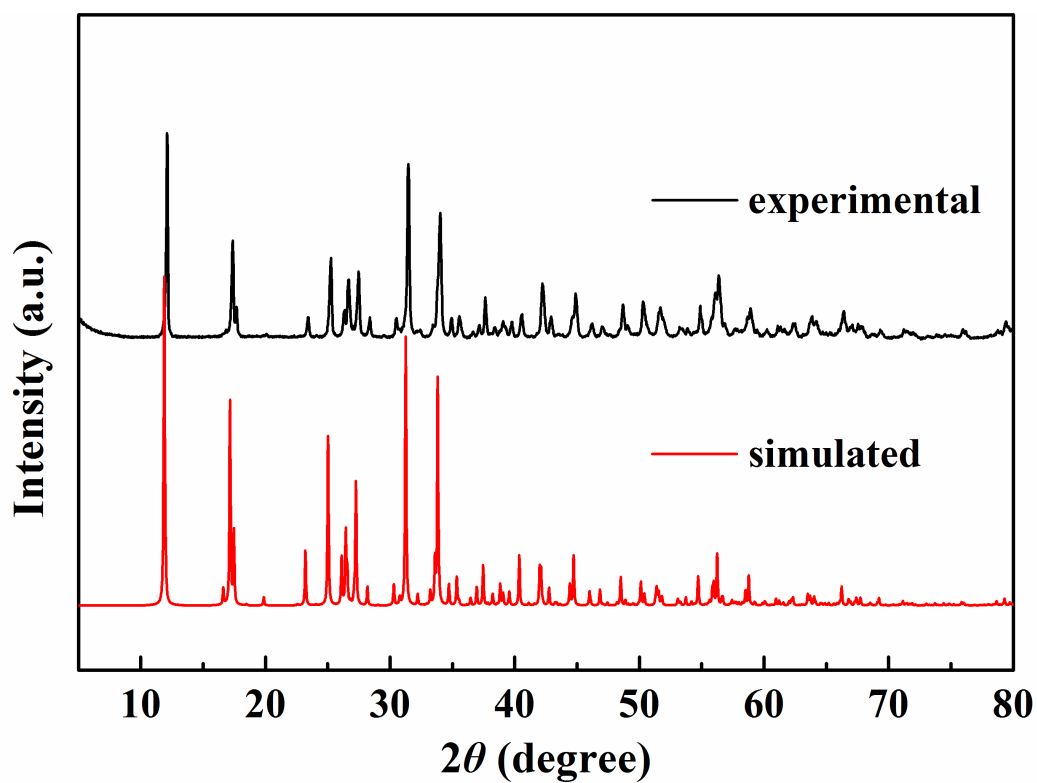

Fig. S1 The powder XRD patterns of  $\text{Na}_5\text{Mn}_4(\text{PO}_4)_4\text{F}_4 \cdot 2\text{H}_2\text{O}$ .

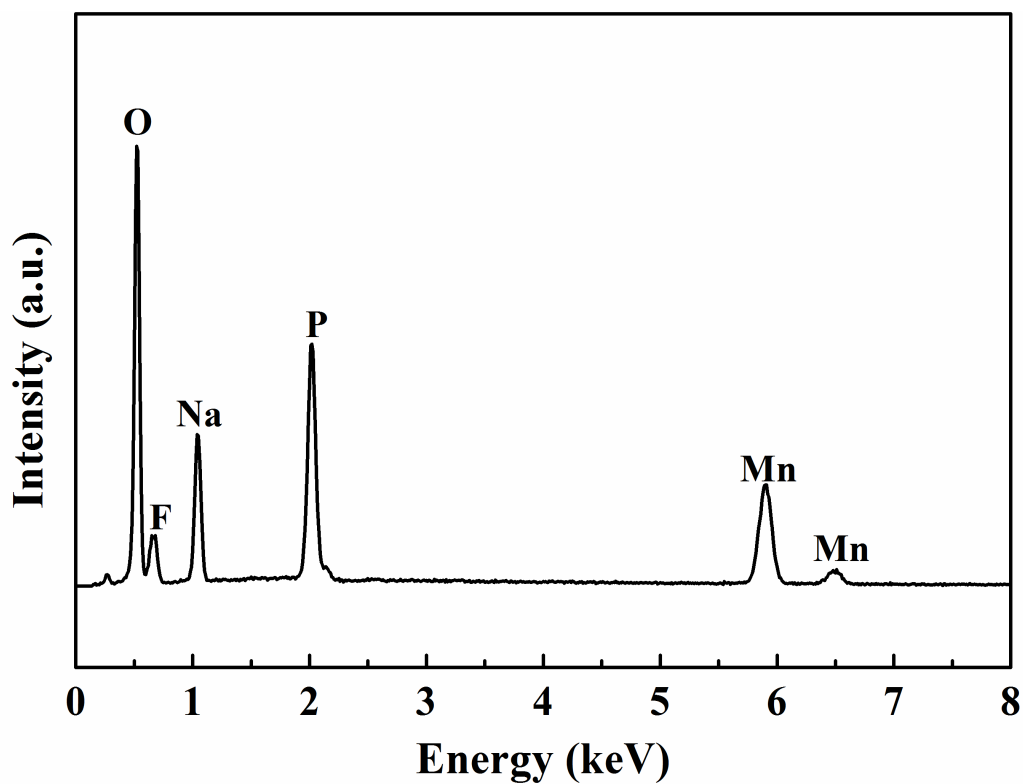

Fig. S2 The energy-dispersive spectrometry (EDS) of  $\text{Na}_5\text{Mn}_4(\text{PO}_4)_4\text{F}_4 \cdot 2\text{H}_2\text{O}$

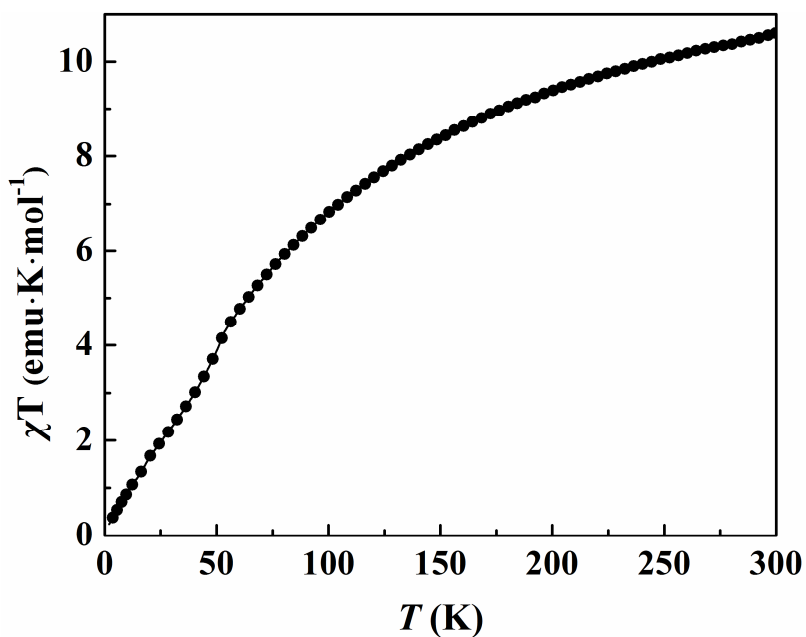

**Fig. S3** The  $\chi T$  - $T$  curve (effective magnetic moment) of  $\text{Na}_5\text{Mn}_4(\text{PO}_4)_4\text{F}_4 \cdot 2\text{H}_2\text{O}$ .

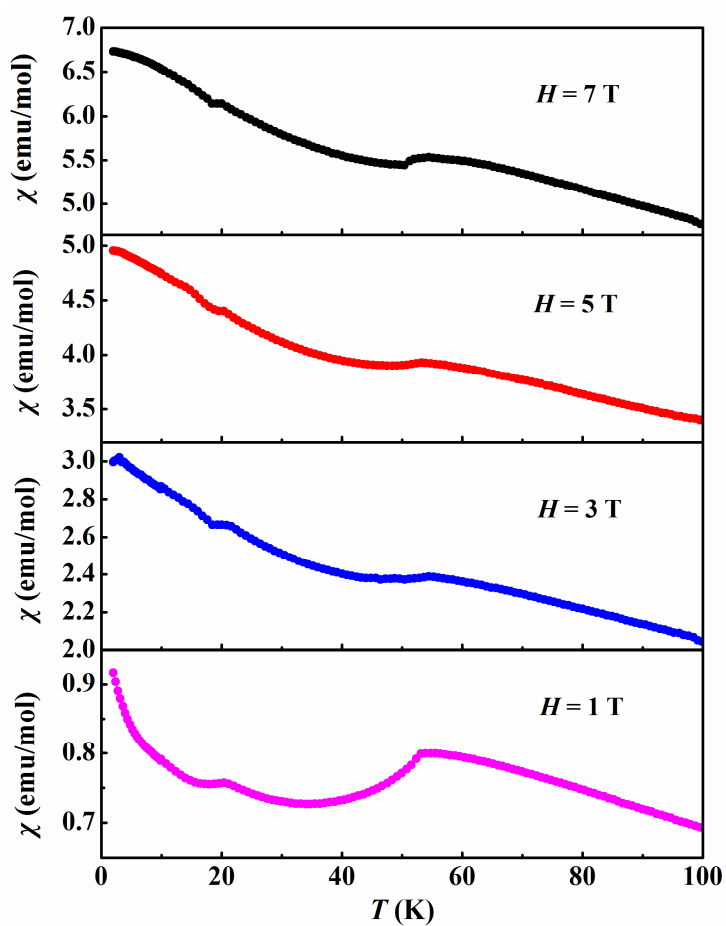

**Fig. S4** Magnetic susceptibilities of  $\text{Na}_5\text{Mn}_4(\text{PO}_4)_4\text{F}_4 \cdot 2\text{H}_2\text{O}$  measured at different magnetic fields.

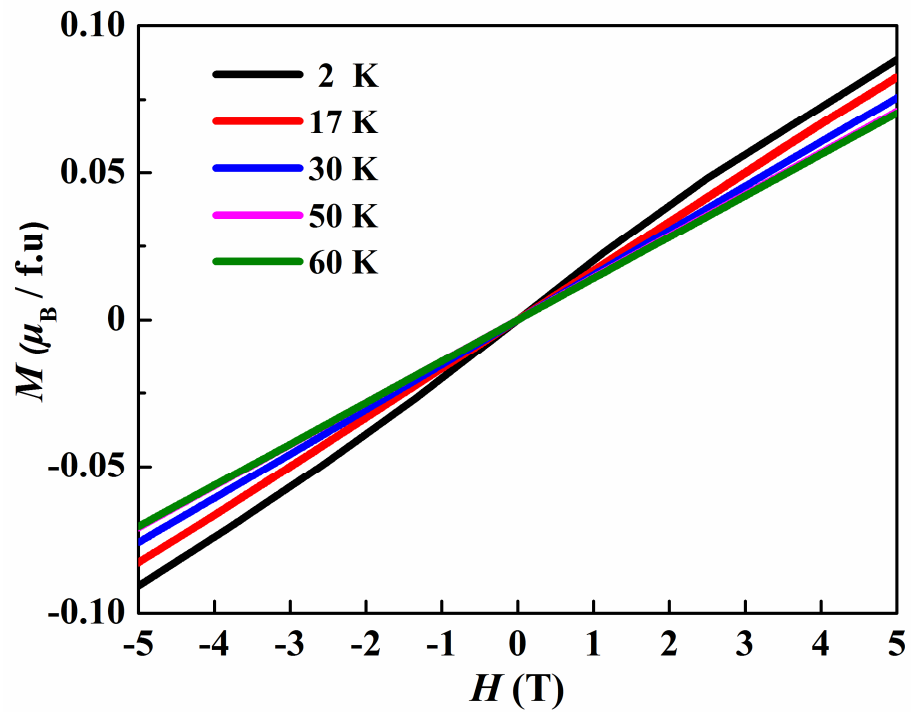

**Fig. S5** Magnetization curves of  $\text{Na}_5\text{Mn}_4(\text{PO}_4)_4\text{F}_4 \cdot 2\text{H}_2\text{O}$  measured under applied field of -8T to 8T at different temperatures.

**Table S1** Crystal data and structure refinements for Na<sub>5</sub>Mn<sub>4</sub>(PO<sub>4</sub>)<sub>4</sub>F<sub>4</sub>·2H<sub>2</sub>O.

| Formula                            | Na <sub>5</sub> Mn <sub>4</sub> (PO <sub>4</sub> ) <sub>4</sub> F <sub>4</sub> ·2H <sub>2</sub> O |
|------------------------------------|---------------------------------------------------------------------------------------------------|
| Fw                                 | 826.62                                                                                            |
| Space group                        | <i>C2/m</i>                                                                                       |
| <i>a</i> (Å)                       | 13.1778(8)                                                                                        |
| <i>b</i> (Å)                       | 8.9315(5)                                                                                         |
| <i>c</i> (Å)                       | 7.4586(5)                                                                                         |
| $\alpha$ (°)                       | 90                                                                                                |
| $\beta$ (°)                        | 93.243(6)                                                                                         |
| $\gamma$ (°)                       | 90                                                                                                |
| <i>V</i> (Å <sup>3</sup> )         | 876.45(9)                                                                                         |
| <i>Z</i>                           | 2                                                                                                 |
| $\rho_{calc}$ (g/cm <sup>3</sup> ) | 3.132                                                                                             |
| $\mu$ (mm <sup>-1</sup> )          | 29.000                                                                                            |
| GOF on F <sup>2</sup>              | 1.085                                                                                             |
| $R_1, wR_2 [I > 2\sigma(I)]^a$     | 0.0411, 0.1095                                                                                    |
| $R_1, wR_2$ [all data]             | 0.0422, 0.1103                                                                                    |

<sup>a</sup>  $R_1 = \sum ||F_o| - |F_c|| / \sum |F_o|$ ,  $wR_2 = \{\sum w[(F_o)^2 - (F_c)^2]^2 / \sum w[(F_o)^2]^2\}^{1/2}$

**Table S2** Fractional Atomic Coordinates ( $\times 10^4$ ) and Equivalent Isotropic Displacement Parameters ( $\text{\AA}^2 \times 10^3$ ) for  $\text{Na}_5\text{Mn}_4(\text{PO}_4)_4\text{F}_4 \cdot 2\text{H}_2\text{O}$ .  $U_{\text{eq}}$  is defined as 1/3 of the trace of the orthogonalized  $U_{\text{IJ}}$  tensor.

| <b>Atom</b> | <b><i>x</i></b> | <b><i>y</i></b> | <b><i>z</i></b> | <b><b>U(eq)</b></b> |
|-------------|-----------------|-----------------|-----------------|---------------------|
| Mn1         | 5000            | 0               | 5000            | 14.6(3)             |
| Mn2         | 5000            | 5000            | 10000           | 13.7(3)             |
| Mn3         | 7217.0(5)       | 0               | 10712.8(9)      | 13.0(3)             |
| P1          | 6209.9(6)       | 2531.5(9)       | 7904.1(10)      | 13.6(3)             |
| Na1         | 5000            | 0               | 10000           | 21.8(6)             |
| Na2         | 3690.4(11)      | 2778.9(19)      | 6866(2)         | 28.2(4)             |
| F1          | 8439(2)         | 0               | 9114(4)         | 20.1(6)             |
| F2          | 5934(2)         | 0               | 2696(4)         | 20.0(6)             |
| O1          | 5269.9(16)      | 3494(3)         | 8239(3)         | 17.5(5)             |
| O2          | 7174.5(17)      | 3502(3)         | 7758(3)         | 18.0(5)             |
| O3          | 6015.8(17)      | 1693(3)         | 6156(3)         | 21.2(5)             |
| O4          | 6380.2(16)      | 1485(3)         | 9533(3)         | 21.2(6)             |
| O5          | 2981(3)         | 5000            | 5623(5)         | 29.7(8)             |



**Table S3** Anisotropic Displacement Parameters ( $\text{\AA}^2 \times 10^3$ ) for  $\text{Na}_5\text{Mn}_4(\text{PO}_4)_4\text{F}_4 \cdot 2\text{H}_2\text{O}$ .

The Anisotropic displacement factor exponent takes the form:

$$-2\pi^2[h^2a^2U_{11}+2hka*b*U_{12}+\dots].$$

| Atom | $U_{11}$ | $U_{22}$ | $U_{33}$ | $U_{23}$ | $U_{13}$ | $U_{12}$ |
|------|----------|----------|----------|----------|----------|----------|
| Mn1  | 17.2(5)  | 9.9(5)   | 17.0(5)  | 0        | 3.7(4)   | 0        |
| Mn2  | 16.4(5)  | 8.0(5)   | 17.0(5)  | 0        | 4.4(4)   | 0        |
| Mn3  | 15.2(4)  | 7.1(4)   | 16.7(4)  | 0        | 1.9(3)   | 0        |
| P1   | 16.2(5)  | 7.6(5)   | 17.4(5)  | -0.2(2)  | 3.3(3)   | -0.5(3)  |
| Na1  | 18.0(13) | 20.2(14) | 27.6(14) | 0        | 3.5(10)  | 0        |
| Na2  | 26.0(7)  | 24.5(8)  | 34.1(8)  | 1.6(6)   | 2.2(6)   | -2.9(6)  |
| F1   | 16.4(12) | 23.7(15) | 20.8(14) | 0        | 5.0(10)  | 0        |
| F2   | 21.2(13) | 18.7(15) | 20.6(14) | 0        | 5.1(10)  | 0        |
| O1   | 19.0(11) | 12.3(11) | 21.4(11) | -2.3(8)  | 2.2(8)   | 1.1(9)   |
| O2   | 20.6(11) | 12.3(11) | 21.5(11) | -3.2(8)  | 4.9(8)   | -3.5(9)  |
| O3   | 24.1(12) | 15.4(12) | 24.5(12) | -6.5(9)  | 4.6(9)   | -2.4(10) |
| O4   | 20.8(11) | 15.4(12) | 27.6(13) | 6.9(9)   | 1.7(10)  | -0.3(8)  |
| O5   | 37(2)    | 31(2)    | 21.8(18) | 0        | 3.2(15)  | 0        |

**Table S4** Bond lengths for Na<sub>5</sub>Mn<sub>4</sub>(PO<sub>4</sub>)<sub>4</sub>F<sub>4</sub>·2H<sub>2</sub>O.

| Atom-Atom            | Length/Å | Atom-Atom            | Length/Å   |
|----------------------|----------|----------------------|------------|
| Mn1-F2 <sup>4</sup>  | 2.169(3) | P1-O1                | 1.540(2)   |
| Mn1-F2               | 2.169(3) | P1-O2                | 1.548(2)   |
| Mn1-O3 <sup>2</sup>  | 2.166(2) | P1-O3                | 1.513(2)   |
| Mn1-O3               | 2.166(2) | P1-O4                | 1.539(2)   |
| Mn1-O3 <sup>3</sup>  | 2.166(2) | Na1-F2 <sup>4</sup>  | 2.297(3)   |
| Mn1-O3 <sup>4</sup>  | 2.166(2) | Na1-F2 <sup>11</sup> | 2.297(3)   |
| Mn2-F1 <sup>8</sup>  | 2.124(3) | Na1-O4 <sup>7</sup>  | 2.294(2)   |
| Mn2-F1 <sup>9</sup>  | 2.124(3) | Na1-O4 <sup>10</sup> | 2.294(2)   |
| Mn2-O1 <sup>6</sup>  | 1.927(2) | Na1-O4 <sup>2</sup>  | 2.294(2)   |
| Mn2-O1 <sup>7</sup>  | 1.927(2) | Na1-O4               | 2.294(2)   |
| Mn2-O1               | 1.927(2) | Na2-F1 <sup>9</sup>  | 2.630(2)   |
| Mn2-O1 <sup>5</sup>  | 1.927(2) | Na2-F2 <sup>4</sup>  | 2.5483(18) |
| Mn3-F1               | 2.058(3) | Na2-O1               | 2.355(3)   |
| Mn3-F2 <sup>11</sup> | 2.309(3) | Na2-O2 <sup>14</sup> | 2.427(3)   |
| Mn3-O2 <sup>8</sup>  | 1.905(2) | Na2-O3 <sup>3</sup>  | 2.504(3)   |
| Mn3-O2 <sup>12</sup> | 1.905(2) | Na2-O4 <sup>7</sup>  | 2.930(3)   |
| Mn3-O4               | 1.908(2) | Na2-O5               | 2.360(3)   |
| Mn3-O4 <sup>2</sup>  | 1.908(2) | -                    |            |

<sup>1</sup>+X,+Y,-1+Z; <sup>2</sup>1-X,+Y,1-Z; <sup>3</sup>1-X,-Y,1-Z; <sup>4</sup>+X,-Y,+Z; <sup>5</sup>+X,1-Y,+Z; <sup>6</sup>1-X,+Y,2-Z; <sup>7</sup>1-X,1-Y,2-Z; <sup>8</sup>3/2-X,1/2-Y,2-Z; <sup>9</sup>-1/2+X,1/2+Y,+Z; <sup>10</sup>1-X,-Y,2-Z; <sup>11</sup>+X,+Y,1+Z; <sup>12</sup>3/2-X,-1/2+Y,2-Z; <sup>13</sup>1/2+X,1/2-Y,+Z; <sup>14</sup>-1/2+X,1/2-Y,+Z

**Table S5** Angles for Na<sub>5</sub>Mn<sub>4</sub>(PO<sub>4</sub>)<sub>4</sub>F<sub>4</sub>·2H<sub>2</sub>O.

| <b>Atom-Atom-Atom</b>                | <b>Angle/°</b> | <b>Atom-Atom-Atom</b>                  | <b>Angle/°</b> |
|--------------------------------------|----------------|----------------------------------------|----------------|
| F2-Mn1-F2 <sup>3</sup>               | 180.00(15)     | O4 <sup>4</sup> -Mn3-O4                | 88.11(15)      |
| O3 <sup>2</sup> -Mn1-F2 <sup>3</sup> | 87.13(8)       | O1-P1-O2                               | 111.72(14)     |
| O3 <sup>2</sup> -Mn1-F2              | 92.87(8)       | O3-P1-O1                               | 108.52(13)     |
| O3 <sup>4</sup> -Mn1-F2              | 87.13(8)       | O3-P1-O2                               | 108.42(13)     |
| O3 <sup>4</sup> -Mn1-F2 <sup>3</sup> | 92.87(8)       | O3-P1-O4                               | 112.95(16)     |
| O3-Mn1-F2                            | 87.13(8)       | O4-P1-O1                               | 107.09(13)     |
| O3 <sup>3</sup> -Mn1-F2 <sup>3</sup> | 87.13(8)       | O4-P1-O2                               | 108.19(13)     |
| O3-Mn1-F2 <sup>3</sup>               | 92.87(8)       | F2 <sup>3</sup> -Na1-F2 <sup>11</sup>  | 180            |
| O3 <sup>3</sup> -Mn1-F2              | 92.87(8)       | O4 <sup>10</sup> -Na1-F2 <sup>3</sup>  | 75.11(8)       |
| O3 <sup>3</sup> -Mn1-O3 <sup>2</sup> | 88.56(13)      | O4-Na1-F2 <sup>11</sup>                | 75.11(8)       |
| O3 <sup>3</sup> -Mn1-O3 <sup>4</sup> | 91.44(13)      | O4 <sup>10</sup> -Na1-F2 <sup>11</sup> | 104.89(8)      |
| O3 <sup>4</sup> -Mn1-O3 <sup>2</sup> | 180            | O4 <sup>4</sup> -Na1-F2 <sup>11</sup>  | 75.11(8)       |
| O3 <sup>2</sup> -Mn1-O3              | 91.44(13)      | O4 <sup>5</sup> -Na1-F2 <sup>3</sup>   | 75.11(8)       |
| O3 <sup>3</sup> -Mn1-O3              | 180            | O4-Na1-F2 <sup>3</sup>                 | 104.89(8)      |
| O3 <sup>4</sup> -Mn1-O3              | 88.56(13)      | O4 <sup>4</sup> -Na1-F2 <sup>3</sup>   | 104.89(8)      |
| F1 <sup>9</sup> -Mn2-F1 <sup>8</sup> | 180            | O4 <sup>5</sup> -Na1-F2 <sup>11</sup>  | 104.89(8)      |
| O1 <sup>6</sup> -Mn2-F1 <sup>8</sup> | 89.96(8)       | O4 <sup>10</sup> -Na1-O4 <sup>4</sup>  | 109.32(13)     |
| O1 <sup>7</sup> -Mn2-F1 <sup>9</sup> | 89.96(8)       | O4-Na1-O4 <sup>10</sup>                | 180            |
| O1 <sup>6</sup> -Mn2-F1 <sup>9</sup> | 90.04(8)       | O4 <sup>10</sup> -Na1-O4 <sup>5</sup>  | 70.68(13)      |
| O1-Mn2-F1 <sup>9</sup>               | 89.96(8)       | O4-Na1-O4 <sup>4</sup>                 | 70.68(13)      |
| O1 <sup>7</sup> -Mn2-F1 <sup>8</sup> | 90.04(8)       | O4 <sup>4</sup> -Na1-O4 <sup>5</sup>   | 180            |
| O1 <sup>5</sup> -Mn2-F1 <sup>9</sup> | 90.04(8)       | O4-Na1-O4 <sup>5</sup>                 | 109.32(13)     |
| O1-Mn2-F1 <sup>8</sup>               | 90.04(8)       | F1 <sup>8</sup> -Na2-O4 <sup>5</sup>   | 72.63(8)       |
| O1 <sup>5</sup> -Mn2-F1 <sup>8</sup> | 89.96(8)       | F2 <sup>3</sup> -Na2-F1 <sup>8</sup>   | 133.12(10)     |
| O1-Mn2-O1 <sup>5</sup>               | 91.50(14)      | F2 <sup>3</sup> -Na2-O4 <sup>5</sup>   | 60.97(8)       |
| O1 <sup>6</sup> -Mn2-O1 <sup>5</sup> | 88.50(14)      | O1-Na2-F1 <sup>8</sup>                 | 70.02(9)       |
| O1 <sup>6</sup> -Mn2-O1              | 180            | O1-Na2-F2 <sup>3</sup>                 | 92.75(10)      |
| O1 <sup>6</sup> -Mn2-O1 <sup>7</sup> | 91.50(14)      | O1-Na2-O2 <sup>14</sup>                | 136.85(11)     |
| O1 <sup>7</sup> -Mn2-O1 <sup>5</sup> | 180            | O1-Na2-O3 <sup>2</sup>                 | 108.57(10)     |
| O1-Mn2-O1 <sup>7</sup>               | 88.50(14)      | O1-Na2-O4 <sup>5</sup>                 | 77.39(8)       |
| F1-Mn3-F2 <sup>11</sup>              | 175.58(10)     | O1-Na2-O5                              | 105.27(12)     |
| O2 <sup>12</sup> -Mn3-F1             | 91.73(9)       | O2 <sup>14</sup> -Na2-F1 <sup>8</sup>  | 92.62(9)       |

| Atom-Atom-Atom                         | Angle/°    | Atom-Atom-Atom                        | Angle/°    |
|----------------------------------------|------------|---------------------------------------|------------|
| O2 <sup>9</sup> -Mn3-F1                | 91.73(9)   | O2 <sup>14</sup> -Na2-F2 <sup>3</sup> | 70.30(9)   |
| O2 <sup>12</sup> -Mn3-F2 <sup>11</sup> | 85.12(9)   | O2 <sup>14</sup> -Na2-O3 <sup>2</sup> | 103.63(10) |
| O2 <sup>9</sup> -Mn3-F2 <sup>11</sup>  | 85.12(9)   | O2 <sup>14</sup> -Na2-O4 <sup>5</sup> | 59.59(8)   |
| O2 <sup>9</sup> -Mn3-O2 <sup>12</sup>  | 89.19(14)  | O3 <sup>2</sup> -Na2-F1 <sup>8</sup>  | 153.81(10) |
| O2 <sup>12</sup> -Mn3-O4 <sup>4</sup>  | 90.03(11)  | O3 <sup>2</sup> -Na2-F2 <sup>3</sup>  | 72.49(9)   |
| O2 <sup>9</sup> -Mn3-O4                | 90.03(11)  | O3 <sup>2</sup> -Na2-O4 <sup>5</sup>  | 133.39(10) |
| O2 <sup>9</sup> -Mn3-O4 <sup>4</sup>   | 167.67(11) | O5-Na2-F1 <sup>8</sup>                | 63.59(11)  |
| O2 <sup>12</sup> -Mn3-O4               | 167.67(11) | O5-Na2-F2 <sup>3</sup>                | 159.84(12) |
| O4-Mn3-F1                              | 100.59(9)  | O5-Na2-O2 <sup>14</sup>               | 100.95(12) |
| O4 <sup>4</sup> -Mn3-F1                | 100.59(9)  | O5-Na2-O3 <sup>2</sup>                | 92.86(12)  |
| O4-Mn3-F2 <sup>11</sup>                | 82.55(9)   | O5-Na2-O4 <sup>5</sup>                | 131.23(12) |
| O4 <sup>4</sup> -Mn3-F2 <sup>11</sup>  | 82.55(9)   |                                       |            |

<sup>1</sup>+X,+Y,-1+Z; <sup>2</sup>+X,-Y,+Z; <sup>3</sup>1-X,+Y,1-Z; <sup>4</sup>1-X,-Y,1-Z; <sup>5</sup>1-X,+Y,2-Z; <sup>6</sup>+X,1-Y,+Z; <sup>7</sup>1-X,1-Y,2-Z; <sup>8</sup>-1/2+X,1/2+Y,+Z; <sup>9</sup>3/2-X,1/2-Y,2-Z; <sup>10</sup>1-X,-Y,2-Z; <sup>11</sup>+X,+Y,1+Z; <sup>12</sup>3/2-X,-1/2+Y,2-Z; <sup>13</sup>1/2+X,1/2-Y,+Z; <sup>14</sup>-1/2+X,1/2-Y,+Z; <sup>15</sup>1/2+X,-1/2+Y,+Z

**Table S6** Hydrogen Atom Coordinates ( $\text{\AA} \times 10^4$ ) and Isotropic Displacement Parameters ( $\text{\AA}^2 \times 10^3$ ) for  $\text{Na}_5\text{Mn}_4(\text{PO}_4)_4\text{F}_4 \cdot 2\text{H}_2\text{O}$ .

| Atom | x       | y       | z       | U(eq) |
|------|---------|---------|---------|-------|
| H5A  | 3069.94 | 5000    | 4341.04 | 36    |
| H5B  | 2256.5  | 5000.01 | 5791.59 | 36    |
